# Supplementary material for: Microtubules soften due to cross-sectional flattening
Source: eLife journal article supplement (doi:10.7554/elife.34695), 2018-06-01
Supplement: supp [file elife-34695-supp-v1.zip]

Archive with 7 entries (7 files):
- elife_poa_e34695_Source_Code_File.zip
- elife_poa_e34695_Video_3.mp4
- elife_poa_e34695_Video_1.avi
- elife_poa_e34695_Video_2.mp4
- elife_poa_e34695_Supplementary_File_1.docx
- elife_poa_e34695_Supplementary_File_2.xlsx
- elife_poa_e34695_Transparent_Reporting_File.pdf
