# Supplementary material for: Microtubules soften due to cross-sectional flattening
Source: eLife journal article supplement (doi:10.7554/elife.34695), 2018-06-01
Supplement: supp [file elife-34695-supp-v1.zip › elife_poa_e34695_Supplementary_File_2.xlsx]

## Sheet: raw table
Citation	Tubulin source	Temp (°C)	Variation	EI (×1024 Nm2)	Lp (mm)	Measurement technique
Mizushima-Sugano et al. (1983)	Porcine	25	GDP tubulin	0.45	0.74	Affixed to cover slip
Gittes (1993)		37	With Taxol Rhodamine tubulin with Taxol	22±1.5 21±1	5.1 5.6	Thermal fluctuations
Dye et al. (1993)		37	GDP tubulin with Taxol with MAP mix	1.36 0.13 0.30	0.33±0.09 0.031±0.008 0.074±0.009	Calibrated flow
Venier et al. (1994)	Porcine	37	GDP tubulin with Taxol with Taxotere GDP–BeF3 tubulin GDP tubulin GDP–BeF3 tubulin GDP–AlF4 tubulin	9.2±0.9 4.7±0.4 4.8±0.4 26±2.7 8.5±2 29±5 25±5	2.2 1.1 1.1 6.1 2.0 6.8 5.8	Thermal fluctuations one end calibrated flow
Mickey and Howard (1995)	Bovine	37	GMPCPP tubulin with Tau with Taxol GDP capped with GMPCPP tubulin with Taxol	62±9 34±3 32±2 26±2 21±1	14.5 7.9 7.5 6.1 5.1	Thermal fluctuations
Mickey and Howard (1995)	Bovine	25	GMPCPP tubulin with Tau with Taxol GDP capped with GMPCPP tubulin with Taxol	62±9 34±3 32±2 26±2 21±1	14.5 7.9 7.5 6.1 5.1	Thermal fluctuations
Kurz and Williams (1995)	Bovine	37	GDP tubulin with MAP mix GDP tubulin with MAP mix	35.8±0.95 39.5±1.25 26.4 27.3	8.4±2.2 9.4±2.7 6.2±0.8 6.5±0.8	Calibrated flow thermal fluctuations
Kurachi et al. (1995)	Bovine	37	With MAPs (10 um length) with MAPs (30 um length) with Taxol (5 um length) with Taxol (20 um length)	34±17 200±60 1±0.65 20±6	7.9 46.8 0.2 4.7	Optical trap buckling
Elbaum et al. (1996)	Bovine	27	GDP tubulin	26±10	6.3±2.4	Vesicle deformation
Felgner et al. (1996)	Porcine	22–25	GDP tubulin with Taxol with MAPs GDP tubulin with Taxol with MAPs	3.7±0.8 1±0.3 16±3 4.7±0.4 1.9±0.1 18±3	0.9 0.2 39.2 1.2 0.5 4.4	Optical trap RELAX method optical trap WIGGLE method
Felgner et al. (1997)	Porcine	24–27	GDP tubulin with Taxol with 2% full-length Tau with 18% full-length Tau with 48% full-length Tau with 85% full-length Tau with tau binding repeat constructs with tau projection domain constructs with double tau binding domains with MAP 2c2 with MAP 2d2 with MAP 2c3 with MAP mix	3.8±0.9 1.0±0.3 4.5±1.5 8.9±1.3 9.4±2.6 10.4±3.1 5.8±1.5 to 8.5±1.6 6.1±2 to 9.2±1.4 29.6±9.3 15.1±3.3 16.1±2.7 14.5±3.8 16.0±3.0	0.9 0.2 1.1 2.2 2.3 2.5 1.4 2.2 7.2 3.7 3.9 3.5 3.9	Optical trap RELAX method
Dogterom and Yurke (1997)	Bovine	22	GDP tubulin	34±7	8.4	Thermal fluctuations
Cassimeris et al. (2001)	Porcine		GDP tubulin with XMAP215	18.5±2.0 17.5±2.2	7.1 4.4	Thermal fluctuations one end
Janson and Dogterom (2004)	Bovine	23	Fast polymerization slow polymerzation	18 28	4.2±0.3 6.6±0.9	Thermal fluctations of shape
Pampaloni et al. (2006)	Porcine		With Taxol (2.6 um length) with Taxol (47.5 um length)	0.45 21	0.11±0.05 5.035±0.8	Thermal fluctuations one end
Kikumoto et al. (2006)	Bovine	33	GDP tubulin with Taxol	7.9±0.7 2.0±0.8	1.9 0.5	Optical trap buckling
Brangwynne et al. (2007)	Bovine		With Taxol (25–66 um length) with Taxol (18–25 um length)	12 6.2	2.8±1 1.5±0.7	Thermal fluctuations
van den Heuvel et al. (2007)	Bovine	37	With Taxol	1±0.1	0.24±0.03	Microtubule trajectories
Kawaguchi et al. (2008)	Porcine	20–35	With Taxol with Taxol	2.5±0.5 2.7±0.4	0.6 0.6	Thermal fluctuations one end kinesin forced buckling
van den Heuvel et al. (2008)	Bovine	37	With Taxol (short length) with Taxol (long length)	0.34±0.086 15±1.28	0.08±0.02 3.6±0.3	Microtubule trajectories
Van Mameren et al. (2009)	Porcine		With Taxol	6.1±1.3	1.4	Optical trap buckling

## Sheet: MT bending stiffness
Citation	Tubulin source	Temp (°C)	Tubulin type	EI (×10^24 Nm2)	EI error	Lp (mm)	Measurement technique	Comments	Year
Kurz and Williams (1995)	Bovine	37	GDP tubulin	26.4		6.2	Thermal fluctuations		1995
Venier et al. (1994)	Porcine	37	GDP tubulin	9.2	0.9	2.2	Mechanical bending	Calibrated flow	1994
Kurz and Williams (1995)	Bovine	37	GDP tubulin	35.8	0.95	8.4	Mechanical bending	Calibrated flow	1995
Elbaum et al. (1996)	Bovine	27	GDP tubulin	26	10	6.3	Mechanical bending	Vesicle deformation	1996
Felgner et al. (1996)	Porcine	25	GDP tubulin	3.7	0.8	0.9	Mechanical bending	RELAX method - optical traps	1996
Felgner et al. (1997)	Porcine	24	GDP tubulin	3.8	0.9	0.9	Mechanical bending	RELAX method - optical traps	1997
Dogterom and Yurke (1997)	Bovine	22	GDP tubulin	34	7	8.4	Thermal fluctuations		1997
Cassimeris et al. (2001)	Porcine		GDP tubulin	18.5	2	8.4	Thermal fluctuations	One end	2001
Janson and Dogterom (2004)	Bovine	23	GDP tubulin	18		4.2	Thermal fluctuations	Fast polymerization	2004
Janson and Dogterom (2004)	Bovine	23	GDP tubulin	28		6.6	Thermal fluctuations	slow polymerization	2004
Kikumoto et al. (2006)	Bovine	33	GDP tubulin	7.9	0.7	1.9	Mechanical bending	buckling with optical traps	2006
Dye et al. (1993)		37	GDP tubulin	1.36		0.33	Mechanical bending	Calibrated flow	1993
Mickey and Howard (1995)	Bovine	37	GDP tubulin + GMPCPP cap	26	2		Thermal fluctuations		1995
Gittes (1993)		37	GDP tubulin + Taxol	22	1.5	5.1	Thermal fluctuations		1993
Gittes (1993)		37	GDP tubulin + Taxol	21	1	5.6	Thermal fluctuations	Rhodamine lableld	1993
Dye et al. (1993)		37	GDP tubulin + Taxol	0.13		0.031	Mechanical bending	Calibrated flow	1993
Venier et al. (1994)	Porcine	37	GDP tubulin + Taxol	4.7	0.4	1.2	Thermal fluctuations		1994
Mickey and Howard (1995)	Bovine	37	GDP tubulin + Taxol	32	2		Thermal fluctuations		1995
Felgner et al. (1996)	Porcine	25	GDP tubulin + Taxol	1	0.3	0.2	Mechanical bending	RELAX method - optical traps	1996
Felgner et al. (1996)	Porcine	25	GDP tubulin + Taxol	4.7	0.4	1.2	Mechanical bending	WIGGLE method - optical traps	1996
Felgner et al. (1997)	Porcine	24	GDP tubulin + Taxol	1	0.3	0.2	Mechanical bending	RELAX method - optical traps	1997
Pampaloni et al. (2006)	Porcine		GDP tubulin + Taxol	0.45		0.11	Thermal fluctuations	Length dependent (2.6 um)	2006
Pampaloni et al. (2006)	Porcine		GDP tubulin + Taxol	21		5	Thermal fluctuations	Length dependent (47 um)	2006
Kikumoto et al. (2006)	Bovine	33	GDP tubulin + Taxol	2	0.8	0.5	Mechanical bending	buckling with optical traps	2006
Brangwynne et al. (2007)	Bovine		GDP tubulin + Taxol	6.2		2.8	Thermal fluctuations	Length dependent (18-25 um)	2007
Brangwynne et al. (2007)	Bovine		GDP tubulin + Taxol	12		1.5	Thermal fluctuations	Length dependent (25 - 66 um)	2007
Kawaguchi et al. (2008)	Porcine	20	GDP tubulin + Taxol	2.5	0.5	0.6	Thermal fluctuations	One end	2008
van den Heuvel et al. (2008)	Bovine	37	GDP tubulin + Taxol	0.34	0.086	0.3	Mechanical bending	Length dependent (L<3.5 um)	2008
van den Heuvel et al. (2008)	Bovine	37	GDP tubulin + Taxol	15	1.28	3.6	Mechanical bending	Length dependent (L>3.5 um)	2008
Van Mameren et al. (2009)	Porcine		GDP tubulin + Taxol	6.1	1.3	1.4	Mechanical bending	optical traps	2009
Dye et al. (1993)		37	GDP tubulin + Taxol + MAPs	0.3		0.074	Mechanical bending	Calibrated flow	1993
Mickey and Howard (1995)	Bovine	37	GMPCPP tubulin	62	9	14.5	Thermal fluctuations		1995

## Sheet: MT stiffness (pivoted)
Row Labels	Count of EI (×10^24 Nm2)2	Average of EI (×10^24 Nm2)
Calibrated flow	5	9.358
Microtubule trajectories	2	7.67
Optical trap	8	3.775
GDP tubulin	3	5.13333
GDP tubulin + Taxol	5	2.96
Thermal fluctuations	16	20.9219
GDP tubulin	5	24.98
GDP tubulin + GMPCPP cap	1	26
GDP tubulin + Taxol	9	13.5389
GMPCPP tubulin	1	62
Vesicle deformation	1	26
GDP tubulin	1	26
Grand Total	32	14.1587
